# Supplementary material for: An insight in magnetic field enhanced zero-valent iron/H2O2 Fenton-like systems: Critical role and evolution of the pristine iron oxides layer
Source: PubMed Central journal article supplement (PMC4823663; doi:10.1038/srep24094), 2016-04-07
Supplement: srep24094-s1.pdf [file srep24094-s1.pdf]

## Supplementary information

### An insight in magnetic field enhanced zero-valent iron/H<sub>2</sub>O<sub>2</sub> Fenton-like systems:

#### Critical role and evolution of the pristine iron oxides layer

Wei Xiang<sup>1</sup>, Beiping Zhang<sup>1,\*</sup>, Tao Zhou<sup>1,\*</sup>, Xiaohui Wu<sup>1</sup>, Juan Mao<sup>1</sup>

#### A. Supplementary Tables

**Table S1** One-way ANOVA analyses on 4-CP removal data (different parameters).

**Table S2** One-way ANOVA analyses on 4-CP removal data (for MF effect).

**Table S3** The statistical test of E<sub>a</sub> values from the FL and MF-FL systems.

#### B. Supplementary Figures

**Figure S1** Comparative 4-CP degradation in the FL and MF-FL systems at different ZVI dosages.

**Figure S2** Comparative 4-CP degradation in the FL and MF-FL systems at different H<sub>2</sub>O<sub>2</sub> dosages.

**Figure S3** Comparative 4-CP degradation in the FL and MF-FL systems at different initial pH.

**Figure S4** Comparative 4-CP degradation in the FL and MF-FL systems under different temperature.

**Figure S5** An example of the two-phase identification of 4-CP degradation.

**Figure S6** Time-dependent ESR spectra obtained from (a) FL and (b) MF-FL systems, and (c) the related normalized evolution patterns of hydroxyl radical (For each sample, 50 mM DMPO was added as the trapping reagent).

**Figure S7** Examinations of (a) maleic acid, (b) benzoquinone and (c) hydroquinone by HPLC.

**Figure S8** The simultaneous evolutions of dissolved iron species and pH in the FL and MF-FL systems based on AS-ZVI and AP-ZVI, respectively.

**Figure S9** AFM images (2D) of related ZVI samples and the relevant surface height distributions.

**Figure S10** XRD patterns of pristine ZVI, acid pretreated ZVI, and related ZVI samples collected after reaction.

**Figure S11** Experimental setup of the MF-FL system for the 4-CP degradation.

#### C. Supplementary methods

Analytic methods for 4-CP's intermediates and products.

Preparing procedure of the acid-pretreated ZVI particles.

**Table S1.** One-way ANOVA analyses for the 4-CP removal data (different parameters).

| Parameters                           | No. of groups                     | System |          | F       | P     | Effect * |
|--------------------------------------|-----------------------------------|--------|----------|---------|-------|----------|
| ZVI dosage                           | 4 (0.025, 0.05, 0.1 and 0.5 mg/L) | FL     | Phase I  | 4.99    | 0.057 | I        |
|                                      |                                   |        | Phase II | 10.53   | 0.013 | S        |
|                                      |                                   | MF-FL  | Phase I  | 27.94   | 0.004 | S        |
|                                      |                                   |        | Phase II | 248.58  | 0.000 | S        |
| H <sub>2</sub> O <sub>2</sub> dosage | 5 (0.5, 1, 2, 3.5 and 5 mM)       | FL     | Phase I  | 16.60   | 0.009 | S        |
|                                      |                                   |        | Phase II | 7.33    | 0.025 | S        |
|                                      |                                   | MF-FL  | Phase I  | 1385.83 | 0.000 | S        |
|                                      |                                   |        | Phase II | 549.98  | 0.000 | S        |
| Initial pH                           | 4 (2, 3, 4 and 5)                 | FL     | Phase I  | 57.74   | 0.001 | S        |
|                                      |                                   |        | Phase II | 3.18    | 0.147 | I        |
|                                      |                                   | MF-FL  | Phase I  | 145.28  | 0.000 | S        |
|                                      |                                   |        | Phase II | 271.61  | 0.000 | S        |
| Temperature                          | 4 (10, 20, 30 and 40 °C)          | FL     | Phase I  | 163.71  | 0.000 | S        |
|                                      |                                   |        | Phase II | 33.19   | 0.003 | S        |
|                                      |                                   | MF-FL  | Phase I  | 7.83    | 0.039 | S        |
|                                      |                                   |        | Phase II | 55.25   | 0.001 | S        |

\* S: Statistically significant at the level of 0.05; I: Statistically insignificant at the level of 0.05.

**Table S2.** One-way ANOVA analyses for the 4-CP removal data (MF effect).

| Target         | No. of groups            | Parameters        | Level                                       | No. of phases | F        | P      | Effect * |   |
|----------------|--------------------------|-------------------|---------------------------------------------|---------------|----------|--------|----------|---|
| Magnetic field | 2 (FL and MF-FL systems) | ZVI dosage (mg/L) | 0.025                                       | Phase I       | 2.39     | 0.262  | I        |   |
|                |                          |                   |                                             | Phase II      | 83205    | 0.000  | S        |   |
|                |                          |                   | 0.05                                        | Phase I       | 520.2    | 0.002  | S        |   |
|                |                          |                   |                                             | Phase II      | 52.79    | 0.018  | S        |   |
|                |                          |                   | 0.1                                         | Phase I       | 21.07    | 0.044  | S        |   |
|                |                          |                   |                                             | Phase II      | 212.21   | 0.005  | S        |   |
|                |                          |                   | 0.5                                         | Phase I       | 74.93    | 0.003  | S        |   |
|                |                          |                   |                                             | Phase II      | 179.63   | 0.001  | S        |   |
|                |                          |                   | H <sub>2</sub> O <sub>2</sub> dosage (mM/L) | 0.5           | Phase I  | 16.2   | 0.056    | I |
|                |                          |                   |                                             |               | Phase II | 13.71  | 0.066    | I |
|                |                          |                   |                                             | 1             | Phase I  | 520.20 | 0.002    | S |
|                |                          |                   |                                             |               | Phase II | 52.78  | 0.018    | S |
|                |                          | 2                 |                                             | Phase I       | 592.99   | 0.002  | S        |   |
|                |                          |                   |                                             | Phase II      | 1043.84  | 0.001  | S        |   |
|                |                          | 3.5               |                                             | Phase I       | -        | -      | -        |   |
|                |                          |                   |                                             | Phase II      | 21.20    | 0.044  | S        |   |
|                |                          | 5                 |                                             | Phase I       | -        | -      | -        |   |
|                |                          |                   |                                             | Phase II      | -        | -      | -        |   |
|                |                          | Initial pH        |                                             | 2             | Phase I  | 87.46  | 0.011    | S |
|                |                          |                   |                                             |               | Phase II | 98.50  | 0.010    | S |
|                |                          |                   | 3                                           | Phase I       | 520.20   | 0.002  | S        |   |
|                |                          |                   |                                             | Phase II      | 52.78    | 0.018  | S        |   |
|                |                          |                   | 4                                           | Phase I       | 4.55     | 0.167  | I        |   |
|                |                          |                   |                                             | Phase II      | 0.82     | 0.460  | I        |   |
|                |                          |                   | 5                                           | Phase I       | -        | -      | -        |   |
|                |                          |                   |                                             | Phase II      | -        | -      | -        |   |
|                |                          |                   | Temperature (°C)                            | 10            | Phase I  | 4      | 0.184    | I |
|                |                          |                   |                                             |               | Phase II | 41.50  | 0.023    | S |
| 20             | Phase I                  |                   |                                             | 520.20        | 0.002    | S      |          |   |
|                | Phase II                 |                   |                                             | 52.78         | 0.018    | S      |          |   |
| 30             | Phase I                  | 3.39              |                                             | 0.207         | I        |        |          |   |
|                | Phase II                 | 25.83             |                                             | 0.037         | S        |        |          |   |
| 40             | Phase I                  | 11.81             |                                             | 0.075         | I        |        |          |   |
|                | Phase II                 | 222.20            |                                             | 0.004         | S        |        |          |   |

\* S: Statistically significant at the level of 0.05; I: Statistically insignificant at the level of 0.05.

-: Not applicable.

**Table S3** The statistical test of  $E_a$  values from the FL and MF-FL systems.

|                        | <b>DF</b> | <b>Sum of Squares</b> | <b>Mean Square</b> | <b>F Value</b> | <b>P Value</b> |
|------------------------|-----------|-----------------------|--------------------|----------------|----------------|
| <b>Factor A *</b>      | 1         | 186.3225              | 186.3225           | 102.2346       | 0.06276        |
| <b>Factor B *</b>      | 1         | 2782.563              | 2782.563           | 1526.783       | 0.01629        |
| <b>Model</b>           | 2         | 2968.885              | 1484.443           | 814.5089       | 0.02477        |
| <b>Error</b>           | 1         | 1.8225                | 1.8225             | --             | --             |
| <b>Corrected Total</b> | 3         | 2970.708              | --                 | --             | --             |

\* Factor A: In the absence or presence of MF; Factor B: During the phase I or II.

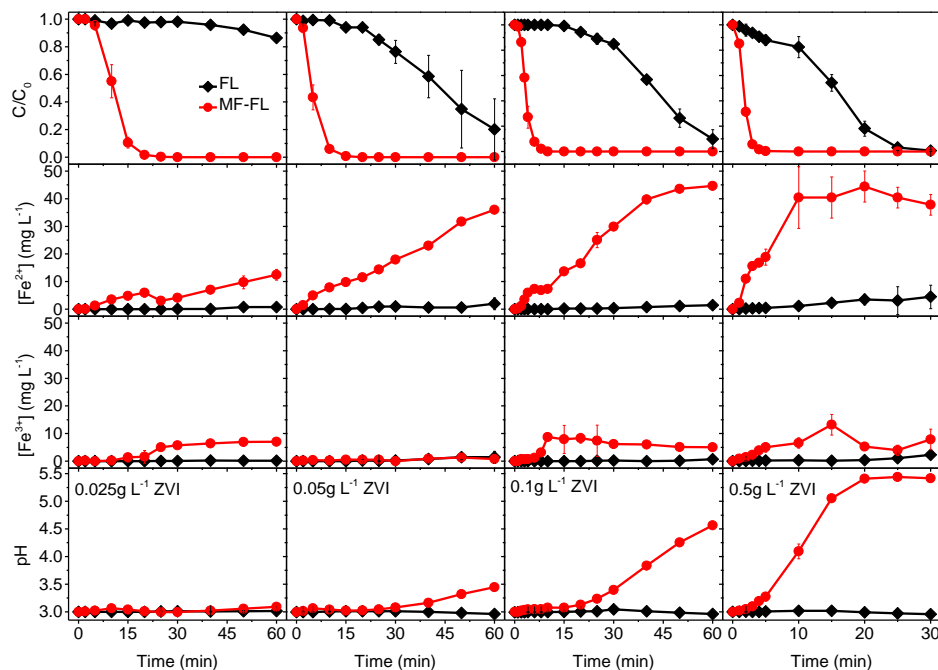

**Figure S1.** Comparative 4-CP Degradation in the FL and MF-FL systems at different ZVI dosages. (Conditions: pH<sub>0</sub> 3, 20 °C, H<sub>2</sub>O<sub>2</sub> 1.0 mM, 4-CP 25 mg L<sup>-1</sup>, ZVI 0.025, 0.05, 0.1 and 0.5 g L<sup>-1</sup>.) The error bars represent the standard deviation based on triplicate experiments.

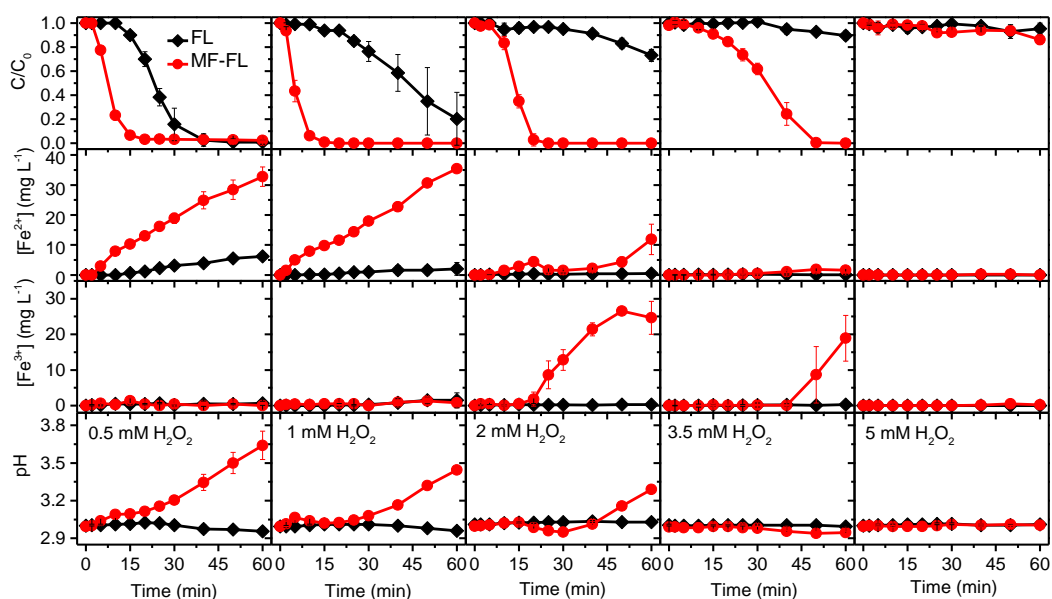

**Figure S2.** Comparative 4-CP Degradation in the FL and MF-FL systems at different H<sub>2</sub>O<sub>2</sub> dosages. (Conditions: pH<sub>0</sub> 3, 20 °C, ZVI 0.05 g L<sup>-1</sup>, 4-CP 25 mg L<sup>-1</sup>, H<sub>2</sub>O<sub>2</sub> 0.5, 1, 2, 3.5 and 5mM.) The error bars represent the standard deviation based on triplicate experiments.

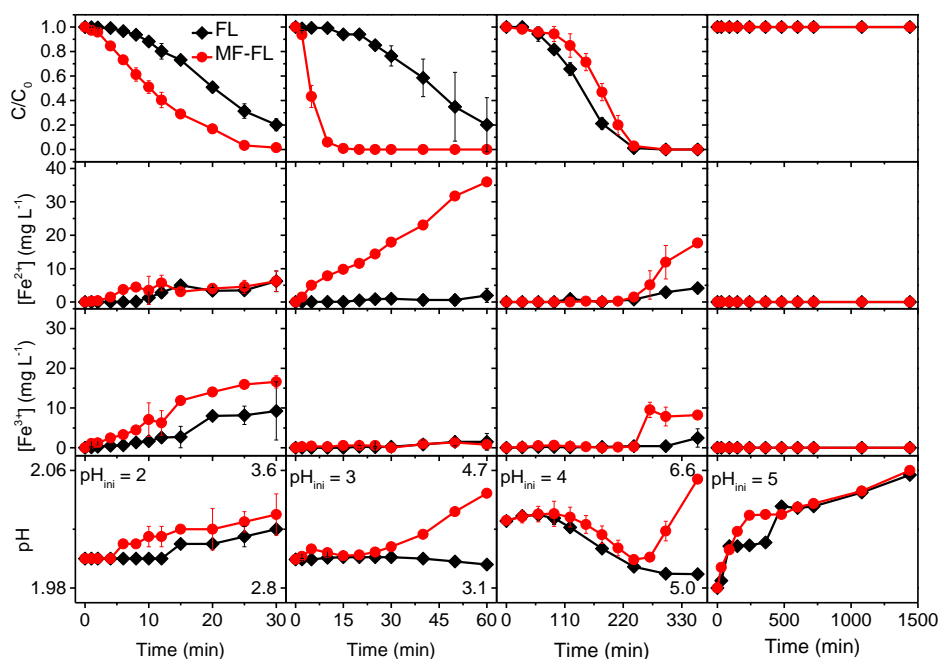

**Figure S3.** Comparative 4-CP Degradation in the FL and MF-FL systems at different initial pH. (Conditions were: 20 °C, 0.05 g L<sup>-1</sup> ZVI, 4-CP 25 mg L<sup>-1</sup>, H<sub>2</sub>O<sub>2</sub> 1.0 mM, pH<sub>0</sub> 2, 3, 4 and 5.) The error bars represent the standard deviation based on triplicate experiments.

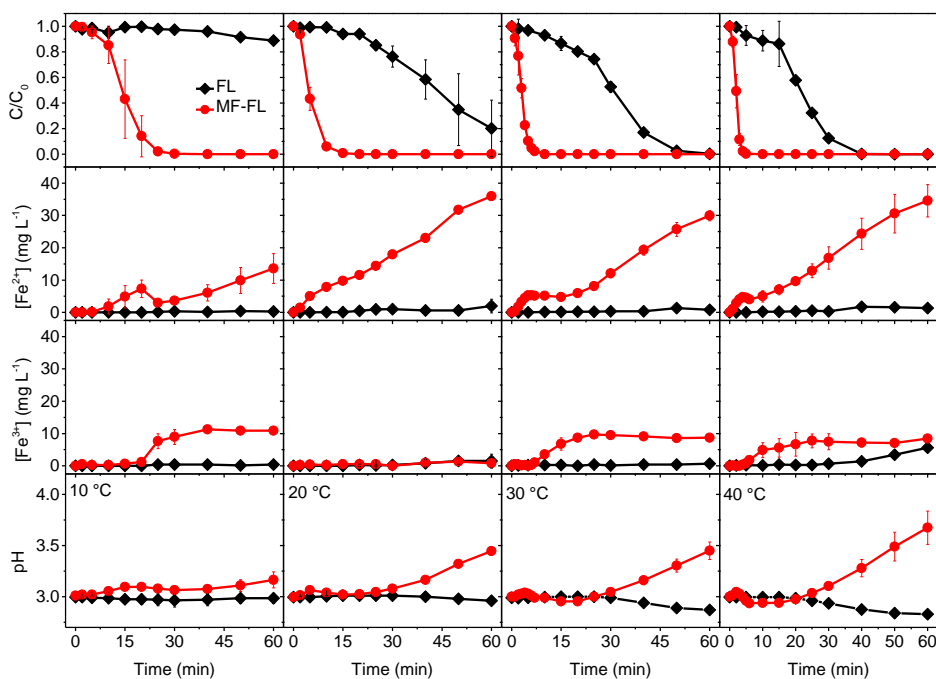

**Figure S4.** Comparative 4-CP Degradation in the FL and MF-FL systems under different temperature. (Conditions were: pH<sub>0</sub> 3, ZVI 0.05 g L<sup>-1</sup>, 4-CP 25 mg L<sup>-1</sup> and H<sub>2</sub>O<sub>2</sub> 1.0 mM, reaction temperature 10, 20, 30 and 40 °C.) The error bars represent the standard deviation based on triplicate experiments.

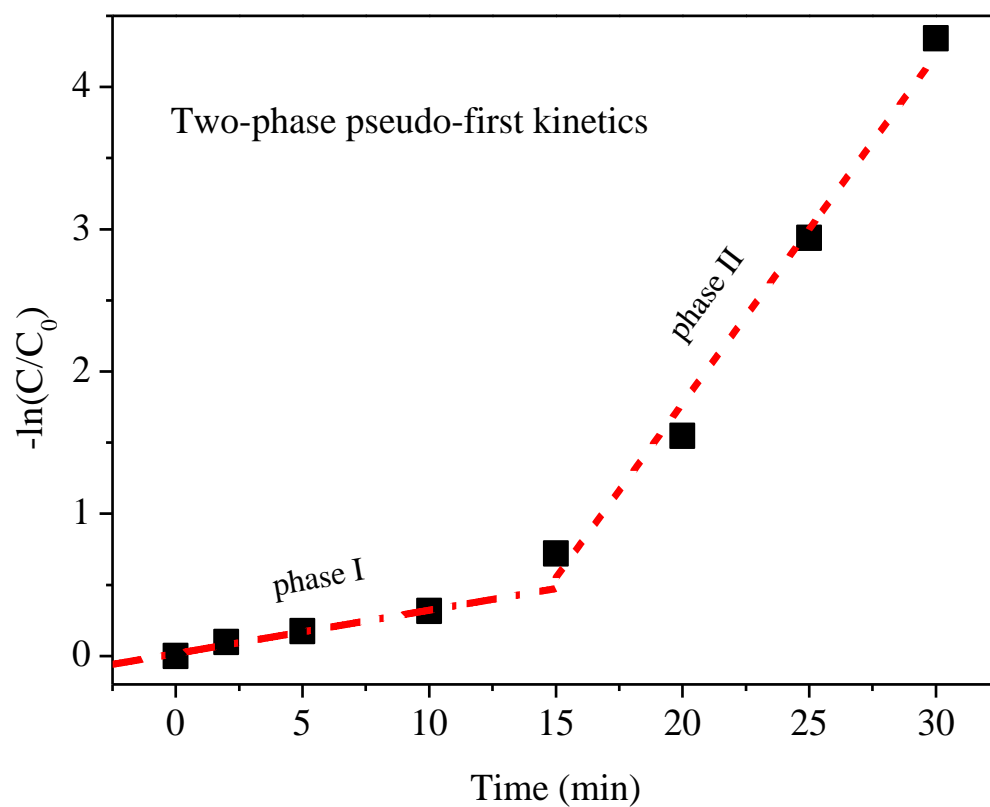

**Figure S5.** An example of the two-phase identification of 4-CP degradation. (FL system, with 0.5 g L<sup>-1</sup> ZVI, 20 °C, 1 mM H<sub>2</sub>O<sub>2</sub> and 25 mg L<sup>-1</sup> 4-CP.)

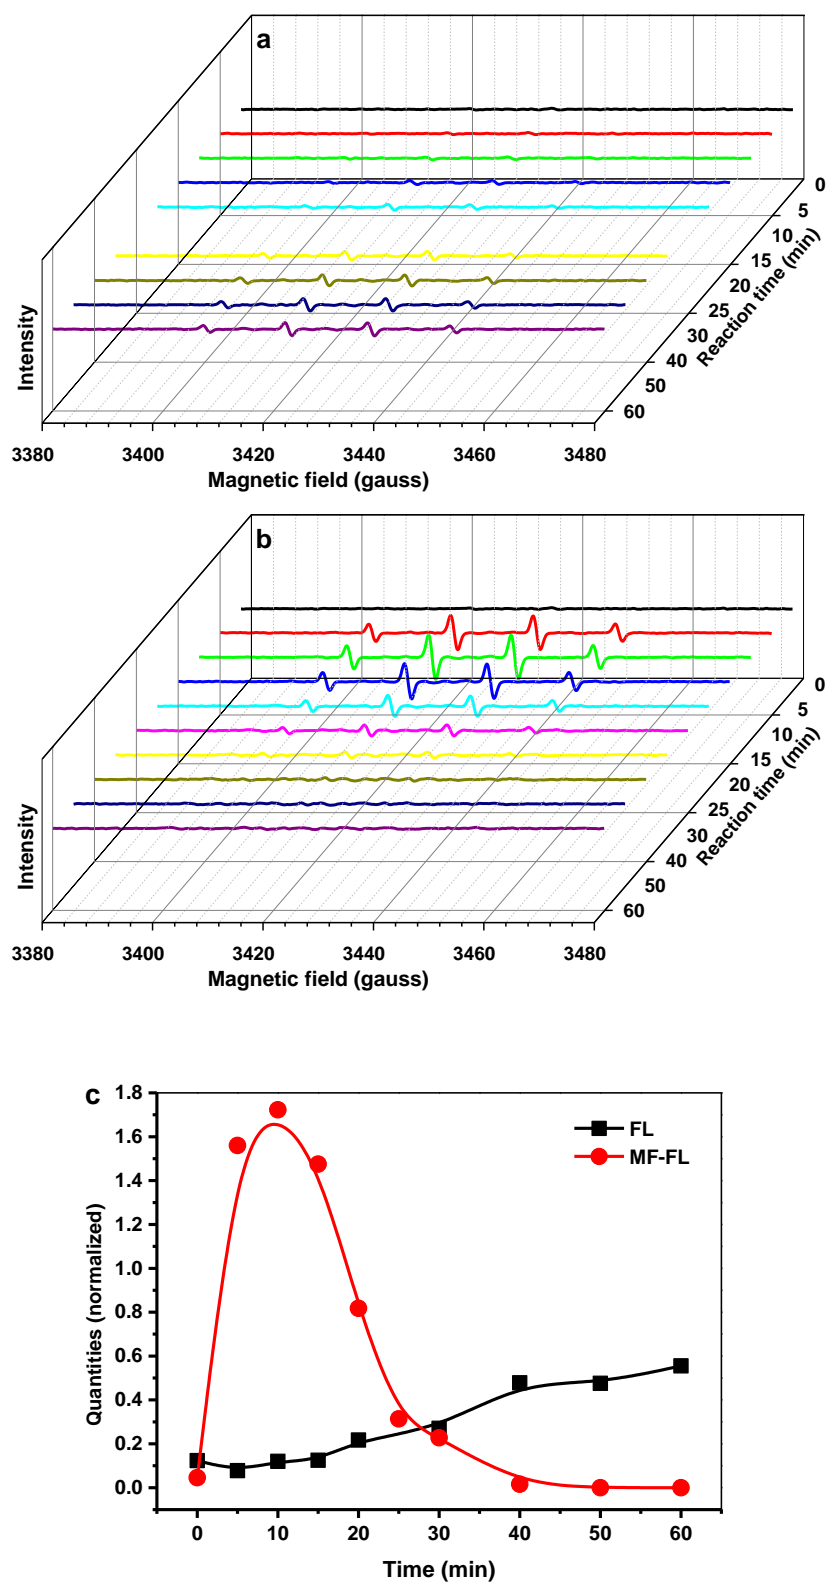

**Figure S6.** Time-dependent ESR spectra obtained from (a) FL and (b) MF-FL systems, and (c) the related normalized evolution patterns of hydroxyl radical (For each sample, 50 mM DMPO was added as the trapping reagent).



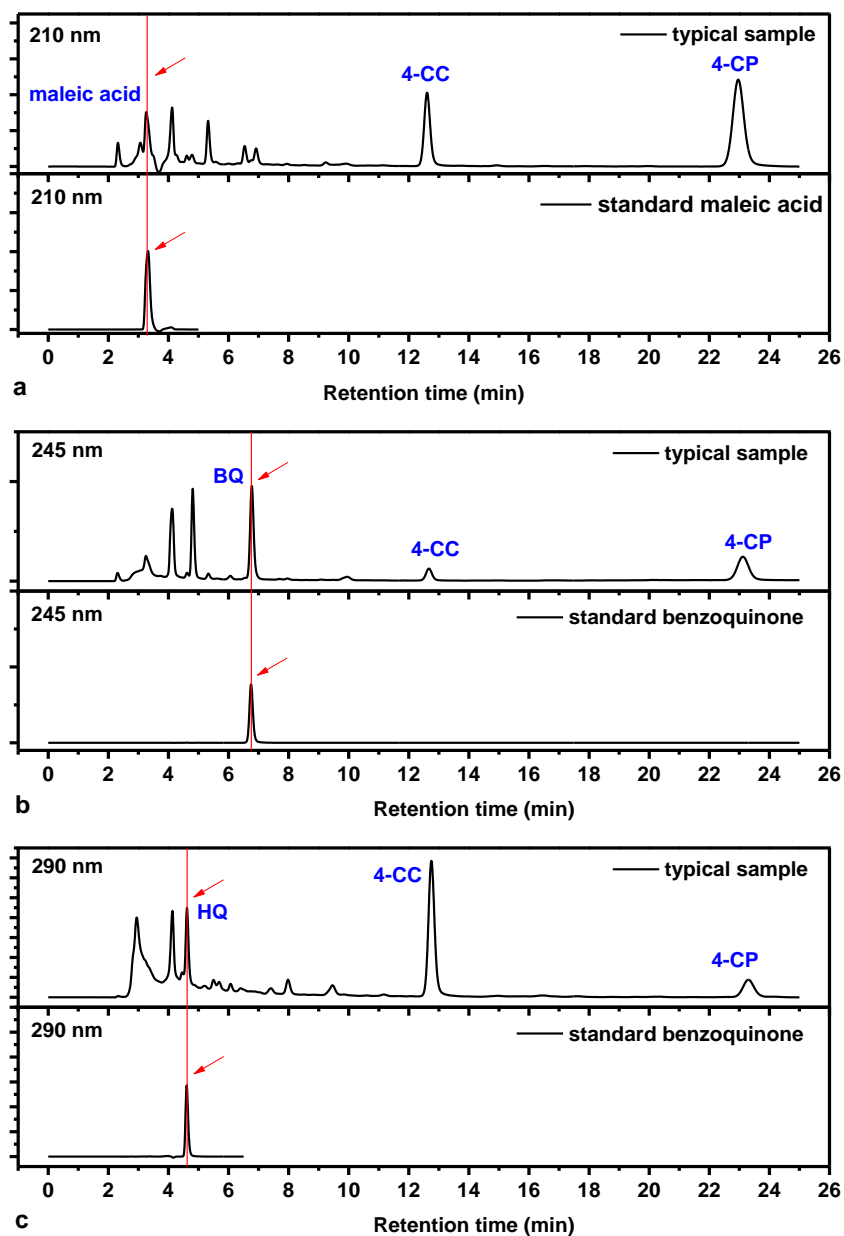

**Figure S7.** Examinations of (a) maleic acid, (b) benzoquinone and (c) hydroquinone by HPLC.

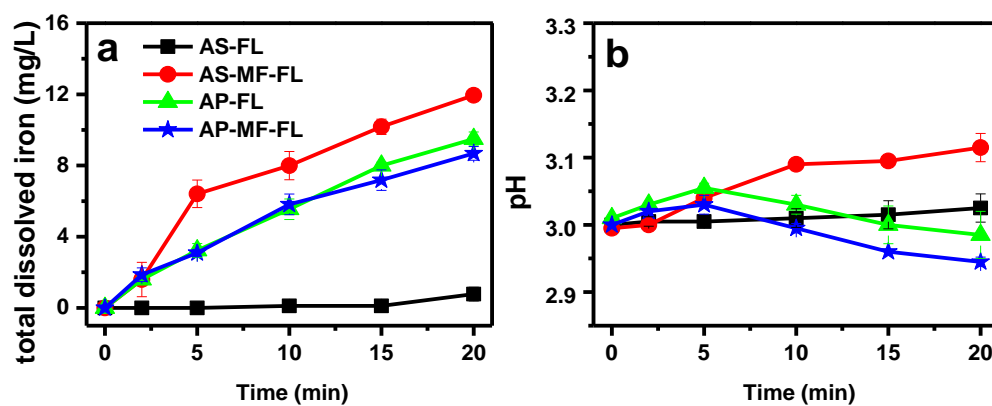

**Figure S8.** The simultaneous evolutions of (a) dissolved iron species (b) pH, corresponding to the FL and MF-FL systems based on AS-ZVI and AP-ZVI, respectively. The error bars represent the standard deviation based on triplicate experiments.

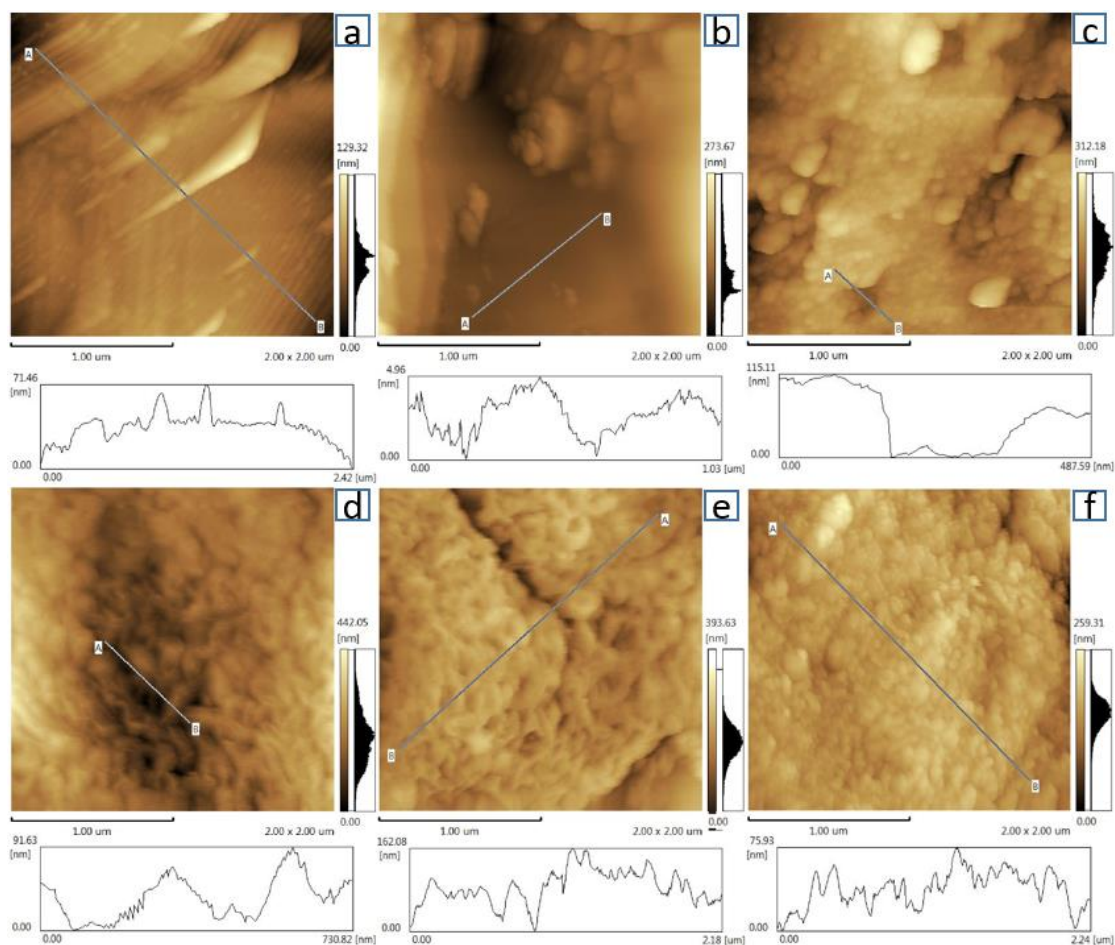

**Figure S9.** AFM 2D images of(a) the pristine AS-ZVI (b) the reacted AS-ZVI (FL, 10 min) (c) the reacted AS-ZVI (MF-FL, 10 min), (d) the original AP-ZVI, (e) the reacted AP-ZVI (FL, 10 min),and (f) the reacted AP-ZVI (MF-FL, 10 min).The relevant surface height distributions along the lines (A-B) plotted in the images are also given.

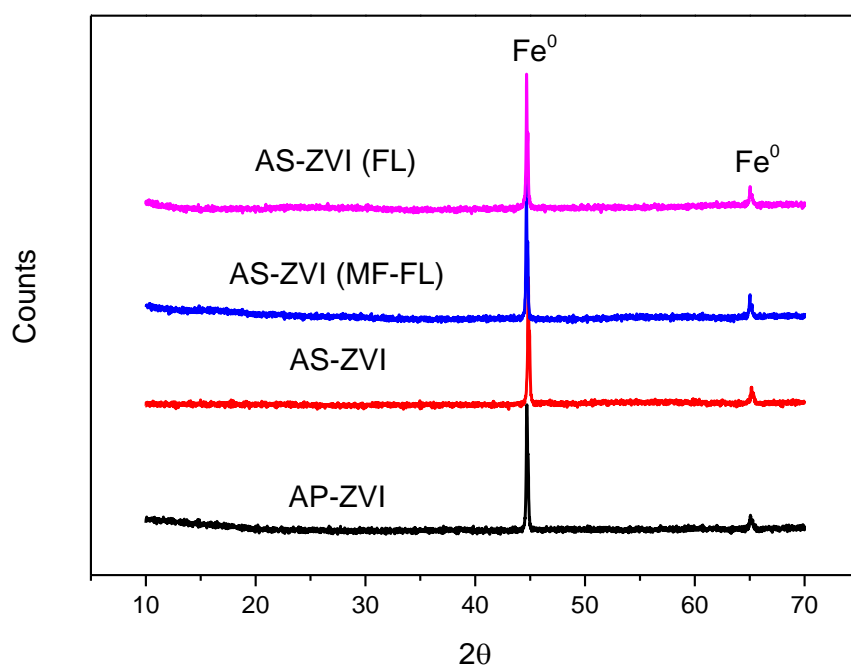

**Figure S10.** XRD patterns of the related ZVI samples.

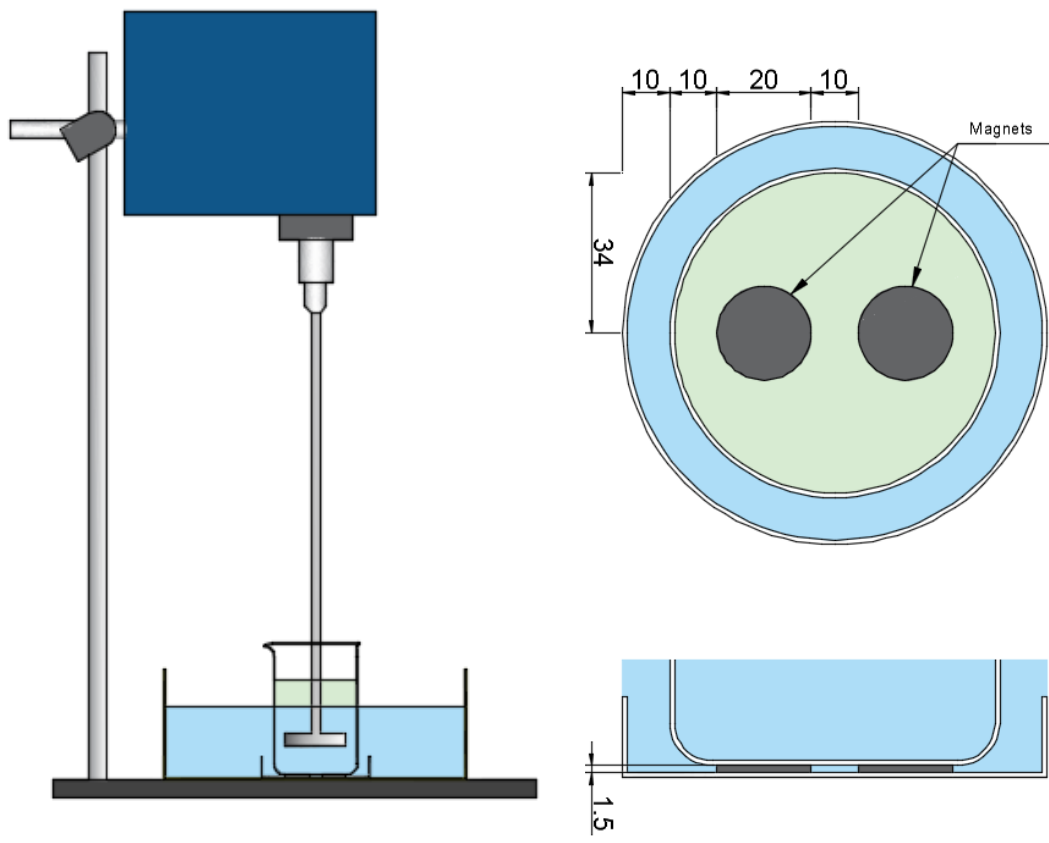

**Figure S11.** Experimental setup of the MF-FL system for the 4-CP degradation.

## **Supplementary methods**

### ***Analytic methods of 4-CP's intermediates and products***

To detect the intermediates of 4-CP degradation, the initial 4-CP concentration was increased to 50 mg L<sup>-1</sup>. The intermediates were qualitatively identified by a gas chromatograph-mass spectrometry (GC-MS, 5975C, Agilent, USA) and a liquid chromatography-electrospray ionization tandem-mass spectrometry (LC-ESI-MS, 1100 LC/MSD Trap, Agilent, USA). A high performance liquid chromatography (HPLC) was used to quantitatively examine the intermediates of 4-CP using the external standards of six purchased pure intermediates.

For GC-MS analysis, an Agilent DB-17 capillary column (30 m × 0.25 mm × 0.50 μm) was utilized. The temperature of the injection block was 300 °C; the oven temperature program was 60 °C, rinsing at 10 °C min<sup>-1</sup> to a final temperature of 280 °C. Helium was used as the carrier gas at the flow rate of 1 mLmin<sup>-1</sup>.

For LC-ESI-MS analysis, a C18 column (WondaSil, 5 μm, 4.6 × 250 mm) was used with a mixture mobile phase of acetonitrile (30%) and 0.1% formic acid solution (70%), and the flow rate was 0.9 mL min<sup>-1</sup>. ESI-MS analysis was carried out with the ion-transfer capillary temperature of 300 °C, and the spray voltage was 45 kV.

For HPLC analysis, the C18 column (WondaSil, 5 μm, 4.6 × 250 mm) was used with a mixture mobile phase of acetonitrile (30%) and 0.1% phosphoric acid solution (70%). Samples were analyzed at a flow rate of 0.9 mL min<sup>-1</sup> and UV absorbance wavelength of 210, 245, 267 and 290 nm, respectively for maleic acid, BQ, 4-CR and HQ, as well as 280 nm for 4-CP, CC and 4-CC.

### ***Preparation of acid-pretreated ZVI***

The acid-pretreated ZVI particles was prepared as follows. 2 g of commercial ZVI powders was added into a 100mL serum containing 60 mL of 1 M HCl. Then the solution was mechanically stirred for 5min. The collected ZVI particles were wash repeatedly by O<sub>2</sub>-free deionized water until the suspension mixtures reached neutral. Afterwards, the separated ZVI particles were freeze-dried overnight and reserved in the anaerobic chamber prior to use.
